# Supplementary material
Source: PubMed Central journal article supplement (PMC2711485)
Supplement: mmc1.pdf [file mmc1.pdf]

Biophysical Journal, Volume 96

**Supporting Material**

**Molecular Model of a Cell Plasma Membrane with an Asymmetric Multicomponent Composition: Water Permeation and Ion Effects**

Robert Vácha, Max L. Berkowitz, and Pavel Jungwirth

This supplementary file contains interaction parameters of employed potassium (denoted as “oK”) in notation of GROMACS version 3.3.1.

[ atomtypes ]

| name | at.num | mass    | charge | ptype | c6           | c12            |
|------|--------|---------|--------|-------|--------------|----------------|
| oK   | 19     | 39.1000 | 1.0000 | A     | 1.343697E-03 | 1.07882507E-06 |

[ nonbond\_params ]

| i    | j  | func | c6           | c12         |
|------|----|------|--------------|-------------|
| O    | oK | 1    | 1.74327E-03  | 1.16855e-06 |
| OM   | oK | 1    | 1.74327E-03  | 3.18689e-06 |
| OA   | oK | 1    | 1.74327E-03  | 1.27474e-06 |
| OW   | oK | 1    | 1.87524E-03  | 1.68544e-06 |
| NR5  | oK | 1    | 1.80926E-03  | 1.91215e-06 |
| OS   | oK | 1    | 1.74327E-03  | 1.27474e-06 |
| NR6  | oK | 1    | 1.80926E-03  | 1.91215e-06 |
| NA   | oK | 1    | 0.311168E-03 | 1.50567e-07 |
| CL   | oK | 1    | 4.30688E-03  | 1.07397e-05 |
| OWT3 | oK | 1    | 1.82877E-03  | 1.62088e-06 |
| OD   | oK | 1    | 1.74703E-03  | 9.00436e-07 |

[ pairtypes ]

| i    | j  | func | cs6        | cs12        |
|------|----|------|------------|-------------|
| O    | oK | 1    | 0.00174327 | 8.94417e-07 |
| OM   | oK | 1    | 0.00174327 | 8.94417e-07 |
| OA   | oK | 1    | 0.00174327 | 8.94417e-07 |
| OW   | oK | 1    | 0.00187524 | 8.94417e-07 |
| N    | oK | 1    | 0.00180926 | 1.35126e-06 |
| NT   | oK | 1    | 0.00180926 | 1.35126e-06 |
| NL   | oK | 1    | 0.00180926 | 1.35126e-06 |
| NR5  | oK | 1    | 0.00180926 | 1.35126e-06 |
| NR5* | oK | 1    | 0.00180926 | 1.35126e-06 |
| NP   | oK | 1    | 0.00180926 | 1.35126e-06 |
| C    | oK | 1    | 0.00177328 | 1.90792e-06 |
| CH1  | oK | 1    | 0.00197797 | 2.00773e-06 |
| CH2  | oK | 1    | 0.00251935 | 2.77045e-06 |
| CH3  | oK | 1    | 0.00303443 | 3.60755e-06 |
| CR51 | oK | 1    | 0.00272554 | 2.9978e-06  |
| CR61 | oK | 1    | 0.00272554 | 2.9978e-06  |
| CB   | oK | 1    | 0.00177328 | 1.90792e-06 |
| CHE  | oK | 1    | 0.00177328 | 1.90792e-06 |
| H    | oK | 1    | 0          | 0           |

|      |    |   |             |             |
|------|----|---|-------------|-------------|
| HO   | oK | 1 | 0           | 0           |
| HW   | oK | 1 | 0           | 0           |
| HS   | oK | 1 | 0           | 0           |
| S    | oK | 1 | 0.00366277  | 3.75629e-06 |
| FE   | oK | 1 | 0           | 0           |
| ZN   | oK | 1 | 0           | 1.0092e-07  |
| NZ   | oK | 1 | 0.00180926  | 1.35126e-06 |
| NE   | oK | 1 | 0.00180926  | 1.35126e-06 |
| P    | oK | 1 | 0.00444994  | 4.89296e-06 |
| OS   | oK | 1 | 0.00174327  | 8.94417e-07 |
| CS1  | oK | 1 | 0.00197797  | 2.00773e-06 |
| NR6  | oK | 1 | 0.00180926  | 1.35126e-06 |
| NR6* | oK | 1 | 0.00180926  | 1.35126e-06 |
| CS2  | oK | 1 | 0.00251935  | 2.77045e-06 |
| SI   | oK | 1 | 0.00444994  | 4.89296e-06 |
| NA   | oK | 1 | 0.000311168 | 1.50567e-07 |
| CL   | oK | 1 | 0.00430688  | 1.07397e-05 |
| CA   | oK | 1 | 0.00116221  | 7.32988e-07 |
| MG   | oK | 1 | 0.000296171 | 6.06359e-08 |
| F    | oK | 1 | 0.00324364  | 5.21503e-06 |
| CP2  | oK | 1 | 0.00251559  | 3.72821e-06 |
| CP3  | oK | 1 | 0.00303071  | 4.49179e-06 |
| CR5  | oK | 1 | 0.00272554  | 2.9978e-06  |
| CR6  | oK | 1 | 0.00272554  | 2.9978e-06  |
| HCR  | oK | 1 | 0.00033741  | 1.27689e-07 |
| OWT3 | oK | 1 | 0.00182877  | 1.62088e-06 |
| SD   | oK | 1 | 0.00376701  | 4.81601e-06 |
| OD   | oK | 1 | 0.00174703  | 9.00436e-07 |
| CD   | oK | 1 | 0.00348732  | 4.84488e-06 |
